# Supplementary material for: RSAT 2022: regulatory sequence analysis tools
Source: PubMed Central journal article supplement (PMC9252783; doi:10.1093/nar/gkac312), 2022-05-11
Supplement: gkac312_supplemental_file.pdf [file gkac312_supplemental_file.pdf]

| Supplementary Table 1 : List of the 187 motif collections integrated in RSAT. This table lists the collection names, date of integration or version, a brief description, and the URL indicating the origin of each database. |                   |                  |               |                        |                                                                                                                                                                                                               |                                                                                                                                                                                                                                 |
|-------------------------------------------------------------------------------------------------------------------------------------------------------------------------------------------------------------------------------|-------------------|------------------|---------------|------------------------|---------------------------------------------------------------------------------------------------------------------------------------------------------------------------------------------------------------|---------------------------------------------------------------------------------------------------------------------------------------------------------------------------------------------------------------------------------|
| Collection name                                                                                                                                                                                                               | Database name     | Number of motifs | Version       | Category               | Brief description                                                                                                                                                                                             | URL of origin of the data                                                                                                                                                                                                       |
| Yeasttract                                                                                                                                                                                                                    | Yeasttract        | 732              | 20130918      | Fungi                  | Yeast motifs compiled from literature and databases                                                                                                                                                           | <a href="http://www.yeasttract.com/">http://www.yeasttract.com/</a>                                                                                                                                                             |
| cisBP_S.cerevisiae                                                                                                                                                                                                            | cisBP             | 776              | 2015-06_v1.02 | Fungi                  | CisBP collects data from >25 sources, including other database such as Transfac, JASPAR, HOCOMOCO, FactorBook, UniProbe, Fly Factor Survey, and dozens of additional publications.                            | <a href="http://cisbp.ccb.utoronto.ca/">http://cisbp.ccb.utoronto.ca/</a>                                                                                                                                                       |
| jaspar_core_nonredundant_fungi                                                                                                                                                                                                | Jaspar            | 183              | 2020          | Fungi                  | Curated, non-redundant set of profiles, derived from published collections of experimentally defined transcription factor binding sites for eukaryotes.                                                       | <a href="http://jaspar2020.genereg.net/download/CORE/JASPAR2020_CORE_fungi_non-redundant_pfms_transfac.txt">http://jaspar2020.genereg.net/download/CORE/JASPAR2020_CORE_fungi_non-redundant_pfms_transfac.txt</a>               |
| jaspar_core_redundant_fungi                                                                                                                                                                                                   | Jaspar            | 184              | 2020          | Fungi                  | Curated set of profiles, derived from published collections of experimentally defined transcription factor binding sites for eukaryotes.                                                                      | <a href="http://jaspar2020.genereg.net/download/CORE/JASPAR2020_CORE_fungi_redundant_pfms_transfac.txt">http://jaspar2020.genereg.net/download/CORE/JASPAR2020_CORE_fungi_redundant_pfms_transfac.txt</a>                       |
| jaspar_core+_unvalidated_fungi                                                                                                                                                                                                | Jaspar            | 231              | 2022          | Fungi                  | Curated set of profiles, derived from published collections of experimentally defined transcription factor binding sites for eukaryotes.                                                                      | <a href="https://jaspar2022.genereg.net/downloads/">https://jaspar2022.genereg.net/downloads/</a>                                                                                                                               |
| cisBP_Saccharomyces_cerevisiae                                                                                                                                                                                                | cisBP             | 1288             | 2019-06_v2.00 | Fungi                  | cisBP specific collection for Saccharomyces_cerevisiae                                                                                                                                                        | <a href="http://cisbp.ccb.utoronto.ca/bulk.php">http://cisbp.ccb.utoronto.ca/bulk.php</a>                                                                                                                                       |
| footprintDB                                                                                                                                                                                                                   | footprintDB       | 11491            | 2020-01       | Multi-categories       | Metadatabase of curated motifs from public databases and the literature                                                                                                                                       | <a href="http://floresta.eead.csic.es/footprintdb">http://floresta.eead.csic.es/footprintdb</a>                                                                                                                                 |
| jaspar_core_nonredundant_all                                                                                                                                                                                                  | Jaspar            | 1646             | 2020          | Multi-categories       | Curated, non-redundant set of profiles, derived from published collections of experimentally defined transcription factor binding sites for eukaryotes.                                                       | <a href="http://jaspar2020.genereg.net/download/CORE/JASPAR2020_CORE_non-redundant_pfms_transfac.txt">http://jaspar2020.genereg.net/download/CORE/JASPAR2020_CORE_non-redundant_pfms_transfac.txt</a>                           |
| jaspar_core_redundant_all                                                                                                                                                                                                     | Jaspar            | 1964             | 2020          | Multi-categories       | Curated set of profiles, derived from published collections of experimentally defined transcription factor binding sites for eukaryotes.                                                                      | <a href="http://jaspar2020.genereg.net/download/CORE/JASPAR2020_CORE_redundant_pfms_transfac.txt">http://jaspar2020.genereg.net/download/CORE/JASPAR2020_CORE_redundant_pfms_transfac.txt</a>                                   |
| jaspar_unvalidated                                                                                                                                                                                                            | Jaspar            | 337              | 2020          | Multi-categories       | JASPAR unvalidated                                                                                                                                                                                            | <a href="http://jaspar2020.genereg.net/download/collections/JASPAR2020_UNVALIDATED_pfms_transfac.txt">http://jaspar2020.genereg.net/download/collections/JASPAR2020_UNVALIDATED_pfms_transfac.txt</a>                           |
| RSAT_nonredundant_insects_plants_vertibrates                                                                                                                                                                                  | RSAT              | 2889             | 2017          | Multi-categories       | Non-redundant collection obtained by automatic clustering of many external databases with RSAT matrix-clustering                                                                                              | <a href="http://pedagogix-tagc.univ-mrs.fr/rsat/data/published_data/Castro_2016_matrix-clustering/">http://pedagogix-tagc.univ-mrs.fr/rsat/data/published_data/Castro_2016_matrix-clustering/</a>                               |
| DrosophilaTFs                                                                                                                                                                                                                 | DrosophilaTFs     | 61               | 2015-11       | Non-vertebrate Metazoa | Curated motifs derived from two different sources: 1) in vitro binding site selection experiments (e.g. SELEX-like methods), and 2) consensus sequences derived from compiled genomic binding site sequences. | <a href="http://bergmanlab.genetics.uga.edu/?page_id=274">http://bergmanlab.genetics.uga.edu/?page_id=274</a>                                                                                                                   |
| FlyFactorSurvey                                                                                                                                                                                                               | FlyFactorSurvey   | 652              | 2016_06       | Non-vertebrate Metazoa | DNA binding specificity data from one-hybrid and DNase I or SELEX methods.                                                                                                                                    | <a href="http://mccb.umassmed.edu/ffs/">http://mccb.umassmed.edu/ffs/</a>                                                                                                                                                       |
| DMMPMM_drosophila                                                                                                                                                                                                             | DMMPMM_drosophila | 41               | 2010_11       | Non-vertebrate Metazoa | Motif predictions within DNase I footprinting data                                                                                                                                                            | <a href="http://autosome.ru/DMMPMM/">http://autosome.ru/DMMPMM/</a>                                                                                                                                                             |
| IDMMPMM_drosophila                                                                                                                                                                                                            | DMMPMM_drosophila | 39               | 2010_11       | Non-vertebrate Metazoa | Drosophila transcription factor motifs built from different available experimental sources                                                                                                                    | <a href="http://autosome.ru/iDMMPMM/">http://autosome.ru/iDMMPMM/</a>                                                                                                                                                           |
| Aniseed                                                                                                                                                                                                                       | Aniseed           | 275              | 2020-08       | Non-vertebrate Metazoa | Aniseed (Ciona robusta motifs detected by SELEX)                                                                                                                                                              | <a href="https://www.aniseed.cnrs.fr/aniseed/download/download_data">https://www.aniseed.cnrs.fr/aniseed/download/download_data</a>                                                                                             |
| cisBP_drosophila                                                                                                                                                                                                              | cisBP             | 1427             | 2014-10_v0.9  | Non-vertebrate Metazoa | cisBP drosophila                                                                                                                                                                                              | <a href="http://cisbp.ccb.utoronto.ca/">http://cisbp.ccb.utoronto.ca/</a>                                                                                                                                                       |
| cisBP_C.elegans                                                                                                                                                                                                               | cisBP             | 1499             | 2015-05_v1.02 | Non-vertebrate Metazoa | cisBP c_elegans                                                                                                                                                                                               | <a href="http://cisbp.ccb.utoronto.ca/">http://cisbp.ccb.utoronto.ca/</a>                                                                                                                                                       |
| footprintDB-metazoa                                                                                                                                                                                                           | footprintDB       | 7763             | 2020-01       | Non-vertebrate Metazoa | Metadatabase of curated motifs from public databases and the literature [only metazoa DNA motifs]                                                                                                             | <a href="http://floresta.eead.csic.es/footprintdb">http://floresta.eead.csic.es/footprintdb</a>                                                                                                                                 |
| jaspar_core_nonredundant_insects                                                                                                                                                                                              | Jaspar            | 143              | 2020          | Non-vertebrate Metazoa | Curated, non-redundant set of profiles, derived from published collections of experimentally defined transcription factor binding sites for eukaryotes.                                                       | <a href="http://jaspar2020.genereg.net/download/CORE/JASPAR2020_CORE_insects_non-redundant_pfms_transfac.txt">http://jaspar2020.genereg.net/download/CORE/JASPAR2020_CORE_insects_non-redundant_pfms_transfac.txt</a>           |
| jaspar_core+_unvalidated_insects                                                                                                                                                                                              | Jaspar            | 156              | 2022          | Non-vertebrate Metazoa | Curated, non-redundant set of profiles, derived from published collections of experimentally defined transcription factor binding sites for eukaryotes.                                                       | <a href="https://jaspar2022.genereg.net/downloads/">https://jaspar2022.genereg.net/downloads/</a>                                                                                                                               |
| jaspar_core_nonredundant_nematodes                                                                                                                                                                                            | Jaspar            | 43               | 2020          | Non-vertebrate Metazoa | Curated, non-redundant set of profiles, derived from published collections of experimentally defined transcription factor binding sites for eukaryotes.                                                       | <a href="http://jaspar2020.genereg.net/download/CORE/JASPAR2020_CORE_nematodes_non-redundant_pfms_transfac.txt">http://jaspar2020.genereg.net/download/CORE/JASPAR2020_CORE_nematodes_non-redundant_pfms_transfac.txt</a>       |
| jaspar_core+_unvalidated_nematodes                                                                                                                                                                                            | Jaspar            | 45               | 2022          | Non-vertebrate Metazoa | Curated, non-redundant set of profiles, derived from published collections of experimentally defined transcription factor binding sites for eukaryotes.                                                       | <a href="https://jaspar2022.genereg.net/downloads/">https://jaspar2022.genereg.net/downloads/</a>                                                                                                                               |
| jaspar_core_nonredundant_urochordates                                                                                                                                                                                         | Jaspar            | 1                | 2020          | Non-vertebrate Metazoa | Curated, non-redundant set of profiles, derived from published collections of experimentally defined transcription factor binding sites for eukaryotes.                                                       | <a href="http://jaspar2020.genereg.net/download/CORE/JASPAR2020_CORE_urochordates_non-redundant_pfms_transfac.txt">http://jaspar2020.genereg.net/download/CORE/JASPAR2020_CORE_urochordates_non-redundant_pfms_transfac.txt</a> |
| jaspar_core+_unvalidated_urochordates                                                                                                                                                                                         | Jaspar            | 132              | 2022          | Non-vertebrate Metazoa | Curated, non-redundant set of profiles, derived from published collections of experimentally defined transcription factor binding sites for eukaryotes.                                                       | <a href="https://jaspar2022.genereg.net/downloads/">https://jaspar2022.genereg.net/downloads/</a>                                                                                                                               |
| jaspar_core_redundant_insects                                                                                                                                                                                                 | Jaspar            | 153              | 2020          | Non-vertebrate Metazoa | Curated set of profiles, derived from published collections of experimentally defined transcription factor binding sites for eukaryotes.                                                                      | <a href="http://jaspar2020.genereg.net/download/CORE/JASPAR2020_CORE_insects_redundant_pfms_transfac.txt">http://jaspar2020.genereg.net/download/CORE/JASPAR2020_CORE_insects_redundant_pfms_transfac.txt</a>                   |
| jaspar_core_redundant_nematodes                                                                                                                                                                                               | Jaspar            | 43               | 2020          | Non-vertebrate Metazoa | Curated set of profiles, derived from published collections of experimentally defined transcription factor binding sites for eukaryotes.                                                                      | <a href="http://jaspar2020.genereg.net/download/CORE/JASPAR2020_CORE_nematodes_redundant_pfms_transfac.txt">http://jaspar2020.genereg.net/download/CORE/JASPAR2020_CORE_nematodes_redundant_pfms_transfac.txt</a>               |

| Supplementary Table 1 : List of the 187 motif collections integrated in RSAT. This table lists the collection names, date of integration or version, a brief description, and the URL indicating the origin of each database. |               |                  |               |                        |                                                                                                                                          |                                                                                                                                                                                                                         |
|-------------------------------------------------------------------------------------------------------------------------------------------------------------------------------------------------------------------------------|---------------|------------------|---------------|------------------------|------------------------------------------------------------------------------------------------------------------------------------------|-------------------------------------------------------------------------------------------------------------------------------------------------------------------------------------------------------------------------|
| Collection name                                                                                                                                                                                                               | Database name | Number of motifs | Version       | Category               | Brief description                                                                                                                        | URL of origin of the data                                                                                                                                                                                               |
| jaspar_core_redundant_urochordates                                                                                                                                                                                            | Jaspar        | 1                | 2020          | Non-vertebrate Metazoa | Curated set of profiles, derived from published collections of experimentally defined transcription factor binding sites for eukaryotes. | <a href="http://jaspar2020.genereg.net/download/CORE/JASPAR2020_CORE_urochordates_redundant_pfms_transfac.txt">http://jaspar2020.genereg.net/download/CORE/JASPAR2020_CORE_urochordates_redundant_pfms_transfac.txt</a> |
| RSAT_nonredundant_insects                                                                                                                                                                                                     | RSAT          | 350              | 2017          | Non-vertebrate Metazoa | Non-redundant collection obtained by automatic clustering of many external databases with RSAT matrix-clustering                         | <a href="http://pedagogix-tagc.univ-mrs.fr/rsa/data/published_data/Castro_2016_matrix-clustering/">http://pedagogix-tagc.univ-mrs.fr/rsa/data/published_data/Castro_2016_matrix-clustering/</a>                         |
| cisBP_Acyrtosiphon_pisum                                                                                                                                                                                                      | cisBP         | 4022             | 2019-06_v2.00 | Non-vertebrate Metazoa | cisBP Acyrtosiphon_pisum                                                                                                                 | <a href="http://cisbp.ccbbr.utoronto.ca/bulk.php">http://cisbp.ccbbr.utoronto.ca/bulk.php</a>                                                                                                                           |
| cisBP_Aedes_aegypti                                                                                                                                                                                                           | cisBP         | 3985             | 2019-06_v2.00 | Non-vertebrate Metazoa | cisBP Aedes_aegypti                                                                                                                      | <a href="http://cisbp.ccbbr.utoronto.ca/bulk.php">http://cisbp.ccbbr.utoronto.ca/bulk.php</a>                                                                                                                           |
| cisBP_Amphimedon_queenslandica                                                                                                                                                                                                | cisBP         | 2325             | 2019-06_v2.00 | Non-vertebrate Metazoa | cisBP Amphimedon_queenslandica                                                                                                           | <a href="http://cisbp.ccbbr.utoronto.ca/bulk.php">http://cisbp.ccbbr.utoronto.ca/bulk.php</a>                                                                                                                           |
| cisBP_Anopheles_darlingi                                                                                                                                                                                                      | cisBP         | 3542             | 2019-06_v2.00 | Non-vertebrate Metazoa | cisBP Anopheles_darlingi                                                                                                                 | <a href="http://cisbp.ccbbr.utoronto.ca/bulk.php">http://cisbp.ccbbr.utoronto.ca/bulk.php</a>                                                                                                                           |
| cisBP_Anopheles_gambiae                                                                                                                                                                                                       | cisBP         | 4089             | 2019-06_v2.00 | Non-vertebrate Metazoa | cisBP Anopheles_gambiae                                                                                                                  | <a href="http://cisbp.ccbbr.utoronto.ca/bulk.php">http://cisbp.ccbbr.utoronto.ca/bulk.php</a>                                                                                                                           |
| cisBP_Apis_mellifera                                                                                                                                                                                                          | cisBP         | 4133             | 2019-06_v2.00 | Non-vertebrate Metazoa | cisBP Apis_mellifera                                                                                                                     | <a href="http://cisbp.ccbbr.utoronto.ca/bulk.php">http://cisbp.ccbbr.utoronto.ca/bulk.php</a>                                                                                                                           |
| cisBP_Atta_cephalotes                                                                                                                                                                                                         | cisBP         | 3404             | 2019-06_v2.00 | Non-vertebrate Metazoa | cisBP Atta_cephalotes                                                                                                                    | <a href="http://cisbp.ccbbr.utoronto.ca/bulk.php">http://cisbp.ccbbr.utoronto.ca/bulk.php</a>                                                                                                                           |
| cisBP_Bombyx_mori                                                                                                                                                                                                             | cisBP         | 3662             | 2019-06_v2.00 | Non-vertebrate Metazoa | cisBP Bombyx_mori                                                                                                                        | <a href="http://cisbp.ccbbr.utoronto.ca/bulk.php">http://cisbp.ccbbr.utoronto.ca/bulk.php</a>                                                                                                                           |
| cisBP_Brugia_malayi                                                                                                                                                                                                           | cisBP         | 3105             | 2019-06_v2.00 | Non-vertebrate Metazoa | cisBP Brugia_malayi                                                                                                                      | <a href="http://cisbp.ccbbr.utoronto.ca/bulk.php">http://cisbp.ccbbr.utoronto.ca/bulk.php</a>                                                                                                                           |
| cisBP_Caenorhabditis_brenneri                                                                                                                                                                                                 | cisBP         | 3169             | 2019-06_v2.00 | Non-vertebrate Metazoa | cisBP Caenorhabditis_brenneri                                                                                                            | <a href="http://cisbp.ccbbr.utoronto.ca/bulk.php">http://cisbp.ccbbr.utoronto.ca/bulk.php</a>                                                                                                                           |
| cisBP_Caenorhabditis_briggsae                                                                                                                                                                                                 | cisBP         | 3261             | 2019-06_v2.00 | Non-vertebrate Metazoa | cisBP Caenorhabditis_briggsae                                                                                                            | <a href="http://cisbp.ccbbr.utoronto.ca/bulk.php">http://cisbp.ccbbr.utoronto.ca/bulk.php</a>                                                                                                                           |
| cisBP_Caenorhabditis_elegans                                                                                                                                                                                                  | cisBP         | 3438             | 2019-06_v2.00 | Non-vertebrate Metazoa | cisBP Caenorhabditis_elegans                                                                                                             | <a href="http://cisbp.ccbbr.utoronto.ca/bulk.php">http://cisbp.ccbbr.utoronto.ca/bulk.php</a>                                                                                                                           |
| cisBP_Caenorhabditis_japonica                                                                                                                                                                                                 | cisBP         | 3107             | 2019-06_v2.00 | Non-vertebrate Metazoa | cisBP Caenorhabditis_japonica                                                                                                            | <a href="http://cisbp.ccbbr.utoronto.ca/bulk.php">http://cisbp.ccbbr.utoronto.ca/bulk.php</a>                                                                                                                           |
| cisBP_Caenorhabditis_remanei                                                                                                                                                                                                  | cisBP         | 3289             | 2019-06_v2.00 | Non-vertebrate Metazoa | cisBP Caenorhabditis_remanei                                                                                                             | <a href="http://cisbp.ccbbr.utoronto.ca/bulk.php">http://cisbp.ccbbr.utoronto.ca/bulk.php</a>                                                                                                                           |
| cisBP_Ciona_intestinalis                                                                                                                                                                                                      | cisBP         | 3788             | 2019-06_v2.00 | Non-vertebrate Metazoa | cisBP Ciona_intestinalis                                                                                                                 | <a href="http://cisbp.ccbbr.utoronto.ca/bulk.php">http://cisbp.ccbbr.utoronto.ca/bulk.php</a>                                                                                                                           |
| cisBP_Crassostrea_gigas                                                                                                                                                                                                       | cisBP         | 4030             | 2019-06_v2.00 | Non-vertebrate Metazoa | cisBP Crassostrea_gigas                                                                                                                  | <a href="http://cisbp.ccbbr.utoronto.ca/bulk.php">http://cisbp.ccbbr.utoronto.ca/bulk.php</a>                                                                                                                           |
| cisBP_Culex_quinquefasciatus                                                                                                                                                                                                  | cisBP         | 3982             | 2019-06_v2.00 | Non-vertebrate Metazoa | cisBP Culex_quinquefasciatus                                                                                                             | <a href="http://cisbp.ccbbr.utoronto.ca/bulk.php">http://cisbp.ccbbr.utoronto.ca/bulk.php</a>                                                                                                                           |
| cisBP_Danaus_plexippus                                                                                                                                                                                                        | cisBP         | 3886             | 2019-06_v2.00 | Non-vertebrate Metazoa | cisBP Danaus_plexippus                                                                                                                   | <a href="http://cisbp.ccbbr.utoronto.ca/bulk.php">http://cisbp.ccbbr.utoronto.ca/bulk.php</a>                                                                                                                           |
| cisBP_Daphnia_pulex                                                                                                                                                                                                           | cisBP         | 678              | 2019-06_v2.00 | Non-vertebrate Metazoa | cisBP Daphnia_pulex                                                                                                                      | <a href="http://cisbp.ccbbr.utoronto.ca/bulk.php">http://cisbp.ccbbr.utoronto.ca/bulk.php</a>                                                                                                                           |
| cisBP_Dendroctonus_ponderosae                                                                                                                                                                                                 | cisBP         | 3846             | 2019-06_v2.00 | Non-vertebrate Metazoa | cisBP Dendroctonus_ponderosae                                                                                                            | <a href="http://cisbp.ccbbr.utoronto.ca/bulk.php">http://cisbp.ccbbr.utoronto.ca/bulk.php</a>                                                                                                                           |
| cisBP_Drosophila_ananassae                                                                                                                                                                                                    | cisBP         | 4154             | 2019-06_v2.00 | Non-vertebrate Metazoa | cisBP Drosophila_ananassae                                                                                                               | <a href="http://cisbp.ccbbr.utoronto.ca/bulk.php">http://cisbp.ccbbr.utoronto.ca/bulk.php</a>                                                                                                                           |
| cisBP_Drosophila_erecta                                                                                                                                                                                                       | cisBP         | 4347             | 2019-06_v2.00 | Non-vertebrate Metazoa | cisBP Drosophila_erecta                                                                                                                  | <a href="http://cisbp.ccbbr.utoronto.ca/bulk.php">http://cisbp.ccbbr.utoronto.ca/bulk.php</a>                                                                                                                           |
| cisBP_Drosophila_grimshawi                                                                                                                                                                                                    | cisBP         | 4226             | 2019-06_v2.00 | Non-vertebrate Metazoa | cisBP Drosophila_grimshawi                                                                                                               | <a href="http://cisbp.ccbbr.utoronto.ca/bulk.php">http://cisbp.ccbbr.utoronto.ca/bulk.php</a>                                                                                                                           |
| cisBP_Drosophila_melanogaster                                                                                                                                                                                                 | cisBP         | 4514             | 2019-06_v2.00 | Non-vertebrate Metazoa | cisBP Drosophila_melanogaster                                                                                                            | <a href="http://cisbp.ccbbr.utoronto.ca/bulk.php">http://cisbp.ccbbr.utoronto.ca/bulk.php</a>                                                                                                                           |
| cisBP_Drosophila_mojavensis                                                                                                                                                                                                   | cisBP         | 4293             | 2019-06_v2.00 | Non-vertebrate Metazoa | cisBP Drosophila_mojavensis                                                                                                              | <a href="http://cisbp.ccbbr.utoronto.ca/bulk.php">http://cisbp.ccbbr.utoronto.ca/bulk.php</a>                                                                                                                           |
| cisBP_Drosophila_persimilis                                                                                                                                                                                                   | cisBP         | 4161             | 2019-06_v2.00 | Non-vertebrate Metazoa | cisBP Drosophila_persimilis                                                                                                              | <a href="http://cisbp.ccbbr.utoronto.ca/bulk.php">http://cisbp.ccbbr.utoronto.ca/bulk.php</a>                                                                                                                           |
| cisBP_Drosophila_pseudodobscura                                                                                                                                                                                               | cisBP         | 4286             | 2019-06_v2.00 | Non-vertebrate Metazoa | cisBP Drosophila_pseudodobscura                                                                                                          | <a href="http://cisbp.ccbbr.utoronto.ca/bulk.php">http://cisbp.ccbbr.utoronto.ca/bulk.php</a>                                                                                                                           |
| cisBP_Drosophila_sechellia                                                                                                                                                                                                    | cisBP         | 4352             | 2019-06_v2.00 | Non-vertebrate Metazoa | cisBP Drosophila_sechellia                                                                                                               | <a href="http://cisbp.ccbbr.utoronto.ca/bulk.php">http://cisbp.ccbbr.utoronto.ca/bulk.php</a>                                                                                                                           |
| cisBP_Drosophila_simulans                                                                                                                                                                                                     | cisBP         | 4023             | 2019-06_v2.00 | Non-vertebrate Metazoa | cisBP Drosophila_simulans                                                                                                                | <a href="http://cisbp.ccbbr.utoronto.ca/bulk.php">http://cisbp.ccbbr.utoronto.ca/bulk.php</a>                                                                                                                           |
| cisBP_Drosophila_virilis                                                                                                                                                                                                      | cisBP         | 4276             | 2019-06_v2.00 | Non-vertebrate Metazoa | cisBP Drosophila_virilis                                                                                                                 | <a href="http://cisbp.ccbbr.utoronto.ca/bulk.php">http://cisbp.ccbbr.utoronto.ca/bulk.php</a>                                                                                                                           |
| cisBP_Drosophila_willistoni                                                                                                                                                                                                   | cisBP         | 4319             | 2019-06_v2.00 | Non-vertebrate Metazoa | cisBP Drosophila_willistoni                                                                                                              | <a href="http://cisbp.ccbbr.utoronto.ca/bulk.php">http://cisbp.ccbbr.utoronto.ca/bulk.php</a>                                                                                                                           |
| cisBP_Drosophila_yakuba                                                                                                                                                                                                       | cisBP         | 4326             | 2019-06_v2.00 | Non-vertebrate Metazoa | cisBP Drosophila_yakuba                                                                                                                  | <a href="http://cisbp.ccbbr.utoronto.ca/bulk.php">http://cisbp.ccbbr.utoronto.ca/bulk.php</a>                                                                                                                           |
| cisBP_Heliconius_melpomene                                                                                                                                                                                                    | cisBP         | 3647             | 2019-06_v2.00 | Non-vertebrate Metazoa | cisBP Heliconius_melpomene                                                                                                               | <a href="http://cisbp.ccbbr.utoronto.ca/bulk.php">http://cisbp.ccbbr.utoronto.ca/bulk.php</a>                                                                                                                           |
| cisBP_Helobdella_robusta                                                                                                                                                                                                      | cisBP         | 3660             | 2019-06_v2.00 | Non-vertebrate Metazoa | cisBP Helobdella_robusta                                                                                                                 | <a href="http://cisbp.ccbbr.utoronto.ca/bulk.php">http://cisbp.ccbbr.utoronto.ca/bulk.php</a>                                                                                                                           |
| cisBP_Ixodes_scapularis                                                                                                                                                                                                       | cisBP         | 3701             | 2019-06_v2.00 | Non-vertebrate Metazoa | cisBP Ixodes_scapularis                                                                                                                  | <a href="http://cisbp.ccbbr.utoronto.ca/bulk.php">http://cisbp.ccbbr.utoronto.ca/bulk.php</a>                                                                                                                           |
| cisBP_Loa_loa                                                                                                                                                                                                                 | cisBP         | 3085             | 2019-06_v2.00 | Non-vertebrate Metazoa | cisBP Loa_loa                                                                                                                            | <a href="http://cisbp.ccbbr.utoronto.ca/bulk.php">http://cisbp.ccbbr.utoronto.ca/bulk.php</a>                                                                                                                           |
| cisBP_Lottia_gigantea                                                                                                                                                                                                         | cisBP         | 3989             | 2019-06_v2.00 | Non-vertebrate Metazoa | cisBP Lottia_gigantea                                                                                                                    | <a href="http://cisbp.ccbbr.utoronto.ca/bulk.php">http://cisbp.ccbbr.utoronto.ca/bulk.php</a>                                                                                                                           |
| cisBP_Lucilia_cuprina                                                                                                                                                                                                         | cisBP         | 3942             | 2019-06_v2.00 | Non-vertebrate Metazoa | cisBP Lucilia_cuprina                                                                                                                    | <a href="http://cisbp.ccbbr.utoronto.ca/bulk.php">http://cisbp.ccbbr.utoronto.ca/bulk.php</a>                                                                                                                           |
| cisBP_Megaselia_scalaris                                                                                                                                                                                                      | cisBP         | 2683             | 2019-06_v2.00 | Non-vertebrate Metazoa | cisBP Megaselia_scalaris                                                                                                                 | <a href="http://cisbp.ccbbr.utoronto.ca/bulk.php">http://cisbp.ccbbr.utoronto.ca/bulk.php</a>                                                                                                                           |
| cisBP_Melittaea_cinxia                                                                                                                                                                                                        | cisBP         | 3363             | 2019-06_v2.00 | Non-vertebrate Metazoa | cisBP Melittaea_cinxia                                                                                                                   | <a href="http://cisbp.ccbbr.utoronto.ca/bulk.php">http://cisbp.ccbbr.utoronto.ca/bulk.php</a>                                                                                                                           |
| cisBP_Nasonia_vitripennis                                                                                                                                                                                                     | cisBP         | 4064             | 2019-06_v2.00 | Non-vertebrate Metazoa | cisBP Nasonia_vitripennis                                                                                                                | <a href="http://cisbp.ccbbr.utoronto.ca/bulk.php">http://cisbp.ccbbr.utoronto.ca/bulk.php</a>                                                                                                                           |
| cisBP_Nematostella_vectensis                                                                                                                                                                                                  | cisBP         | 3571             | 2019-06_v2.00 | Non-vertebrate Metazoa | cisBP Nematostella_vectensis                                                                                                             | <a href="http://cisbp.ccbbr.utoronto.ca/bulk.php">http://cisbp.ccbbr.utoronto.ca/bulk.php</a>                                                                                                                           |
| cisBP_Octopus_bimaculoides                                                                                                                                                                                                    | cisBP         | 3795             | 2019-06_v2.00 | Non-vertebrate Metazoa | cisBP Octopus_bimaculoides                                                                                                               | <a href="http://cisbp.ccbbr.utoronto.ca/bulk.php">http://cisbp.ccbbr.utoronto.ca/bulk.php</a>                                                                                                                           |
| cisBP_Onchocerca_volvulus                                                                                                                                                                                                     | cisBP         | 2988             | 2019-06_v2.00 | Non-vertebrate Metazoa | cisBP Onchocerca_volvulus                                                                                                                | <a href="http://cisbp.ccbbr.utoronto.ca/bulk.php">http://cisbp.ccbbr.utoronto.ca/bulk.php</a>                                                                                                                           |
| cisBP_Pediculus_humanus                                                                                                                                                                                                       | cisBP         | 4057             | 2019-06_v2.00 | Non-vertebrate Metazoa | cisBP Pediculus_humanus                                                                                                                  | <a href="http://cisbp.ccbbr.utoronto.ca/bulk.php">http://cisbp.ccbbr.utoronto.ca/bulk.php</a>                                                                                                                           |
| cisBP_Pristionchus_pacificus                                                                                                                                                                                                  | cisBP         | 2683             | 2019-06_v2.00 | Non-vertebrate Metazoa | cisBP Pristionchus_pacificus                                                                                                             | <a href="http://cisbp.ccbbr.utoronto.ca/bulk.php">http://cisbp.ccbbr.utoronto.ca/bulk.php</a>                                                                                                                           |
| cisBP_Rhodnius_prolixus                                                                                                                                                                                                       | cisBP         | 3380             | 2019-06_v2.00 | Non-vertebrate Metazoa | cisBP Rhodnius_prolixus                                                                                                                  | <a href="http://cisbp.ccbbr.utoronto.ca/bulk.php">http://cisbp.ccbbr.utoronto.ca/bulk.php</a>                                                                                                                           |
| cisBP_Schistosoma_mansoni                                                                                                                                                                                                     | cisBP         | 3181             | 2019-06_v2.00 | Non-vertebrate Metazoa | cisBP Schistosoma_mansoni                                                                                                                | <a href="http://cisbp.ccbbr.utoronto.ca/bulk.php">http://cisbp.ccbbr.utoronto.ca/bulk.php</a>                                                                                                                           |
| cisBP_Solenopsis_invicta                                                                                                                                                                                                      | cisBP         | 3658             | 2019-06_v2.00 | Non-vertebrate Metazoa | cisBP Solenopsis_invicta                                                                                                                 | <a href="http://cisbp.ccbbr.utoronto.ca/bulk.php">http://cisbp.ccbbr.utoronto.ca/bulk.php</a>                                                                                                                           |
| cisBP_Strigamia_maritima                                                                                                                                                                                                      | cisBP         | 3791             | 2019-06_v2.00 | Non-vertebrate Metazoa | cisBP Strigamia_maritima                                                                                                                 | <a href="http://cisbp.ccbbr.utoronto.ca/bulk.php">http://cisbp.ccbbr.utoronto.ca/bulk.php</a>                                                                                                                           |

| Supplementary Table 1 : List of the 187 motif collections integrated in RSAT. This table lists the collection names, date of integration or version, a brief description, and the URL indicating the origin of each database. |                |                  |               |                        |                                                                                                                                                                                  |                                                                                                                                                                                                                     |
|-------------------------------------------------------------------------------------------------------------------------------------------------------------------------------------------------------------------------------|----------------|------------------|---------------|------------------------|----------------------------------------------------------------------------------------------------------------------------------------------------------------------------------|---------------------------------------------------------------------------------------------------------------------------------------------------------------------------------------------------------------------|
| Collection name                                                                                                                                                                                                               | Database name  | Number of motifs | Version       | Category               | Brief description                                                                                                                                                                | URL of origin of the data                                                                                                                                                                                           |
| cisBP_Strongylocentrotus_purpuratus                                                                                                                                                                                           | cisBP          | 3989             | 2019-06_v2.00 | Non-vertebrate Metazoa | cisBP Strongylocentrotus_purpuratus                                                                                                                                              | <a href="http://cisbp.ccb.utoronto.ca/bulk.php">http://cisbp.ccb.utoronto.ca/bulk.php</a>                                                                                                                           |
| cisBP_Tetranychus_urticae                                                                                                                                                                                                     | cisBP          | 3909             | 2019-06_v2.00 | Non-vertebrate Metazoa | cisBP Tetranychus_urticae                                                                                                                                                        | <a href="http://cisbp.ccb.utoronto.ca/bulk.php">http://cisbp.ccb.utoronto.ca/bulk.php</a>                                                                                                                           |
| cisBP_Tribolium_castaneum                                                                                                                                                                                                     | cisBP          | 4101             | 2019-06_v2.00 | Non-vertebrate Metazoa | cisBP Tribolium_castaneum                                                                                                                                                        | <a href="http://cisbp.ccb.utoronto.ca/bulk.php">http://cisbp.ccb.utoronto.ca/bulk.php</a>                                                                                                                           |
| cisBP_Trichinella_spiralis                                                                                                                                                                                                    | cisBP          | 3131             | 2019-06_v2.00 | Non-vertebrate Metazoa | cisBP Trichinella_spiralis                                                                                                                                                       | <a href="http://cisbp.ccb.utoronto.ca/bulk.php">http://cisbp.ccb.utoronto.ca/bulk.php</a>                                                                                                                           |
| cisBP_Trichoplax_adhaerens                                                                                                                                                                                                    | cisBP          | 2901             | 2019-06_v2.00 | Non-vertebrate Metazoa | cisBP Trichoplax_adhaerens                                                                                                                                                       | <a href="http://cisbp.ccb.utoronto.ca/bulk.php">http://cisbp.ccb.utoronto.ca/bulk.php</a>                                                                                                                           |
| cisBP_Zootermopsis_nevadensis                                                                                                                                                                                                 | cisBP          | 3945             | 2019-06_v2.00 | Non-vertebrate Metazoa | cisBP Zootermopsis_nevadensis                                                                                                                                                    | <a href="http://cisbp.ccb.utoronto.ca/bulk.php">http://cisbp.ccb.utoronto.ca/bulk.php</a>                                                                                                                           |
| ArabidopsisPBM                                                                                                                                                                                                                | ArabidopsisPBM | 108              | 2015-11       | Plants                 | Motifs derived from protein-binding microarrays (PBMs)                                                                                                                           | <a href="http://www.pnas.org/content/111/6/2367.abstract">http://www.pnas.org/content/111/6/2367.abstract</a>                                                                                                       |
| Athamap                                                                                                                                                                                                                       | Athamap        | 84               | 2015-11       | Plants                 | Compiled motifs from databases and literature                                                                                                                                    | <a href="http://www.athamap.de/">http://www.athamap.de/</a>                                                                                                                                                         |
| cistrome                                                                                                                                                                                                                      | cistrome       | 862              | 2016-06       | Plants                 | Motifs derived from DNA affinity purification sequencing (DAP-seq), a high-throughput TF binding site discovery method that interrogates genomic DNA with in-vitro-expressed TFs | <a href="http://neomorph.salk.edu/dev/pages/shuang/dap_web/pages/index.php">http://neomorph.salk.edu/dev/pages/shuang/dap_web/pages/index.php</a>                                                                   |
| cisBP_A_thaliana                                                                                                                                                                                                              | cisBP          | 309              | 2015-06_v1.02 | Plants                 | cisBP_a_thaliana                                                                                                                                                                 | <a href="http://cisbp.ccb.utoronto.ca/">http://cisbp.ccb.utoronto.ca/</a>                                                                                                                                           |
| footprintDB-plants                                                                                                                                                                                                            | footprintDB    | 1997             | 2020-01       | Plants                 | Metadatabase of curated motifs from public databases and the literature [only plant DNA motifs]                                                                                  | <a href="http://floresta.eead.csic.es/footprintdb">http://floresta.eead.csic.es/footprintdb</a>                                                                                                                     |
| jaspar_core_nonredundant_plants                                                                                                                                                                                               | Jaspar         | 530              | 2020          | Plants                 | Curated, non-redundant set of profiles, derived from published collections of experimentally defined transcription factor binding sites for eukaryotes.                          | <a href="http://jaspar2020.genereg.net/download/CORE/JASPAR2020_CORE_plants_non-redundant_pfms_transfac.txt">http://jaspar2020.genereg.net/download/CORE/JASPAR2020_CORE_plants_non-redundant_pfms_transfac.txt</a> |
| jaspar_core_redundant_plants                                                                                                                                                                                                  | Jaspar         | 572              | 2020          | Plants                 | Curated set of profiles, derived from published collections of experimentally defined transcription factor binding sites for eukaryotes.                                         | <a href="http://jaspar2020.genereg.net/download/CORE/JASPAR2020_CORE_plants_redundant_pfms_transfac.txt">http://jaspar2020.genereg.net/download/CORE/JASPAR2020_CORE_plants_redundant_pfms_transfac.txt</a>         |
| jaspar_core+_unvalidated_plants                                                                                                                                                                                               | Jaspar         | 769              | 2022          | Plants                 | Curated, non-redundant set of profiles, derived from published collections of experimentally defined transcription factor binding sites for eukaryotes.                          | <a href="https://jaspar2022.genereg.net/downloads/">https://jaspar2022.genereg.net/downloads/</a>                                                                                                                   |
| RSAT_nonredundant_plants                                                                                                                                                                                                      | RSAT           | 306              | 2017          | Plants                 | Non-redundant collection obtained by automatic clustering of many external databases with RSAT matrix-clustering                                                                 | <a href="http://pedagogix-lagc.univ-mrs.fr/rsat/data/published_data/Castro_2016_matrix-clustering/">http://pedagogix-lagc.univ-mrs.fr/rsat/data/published_data/Castro_2016_matrix-clustering/</a>                   |
| cisBP_Arabidopsis_thaliana                                                                                                                                                                                                    | cisBP          | 1653             | 2019-09_v2.00 | Plants                 | cisBP Arabidopsis_thaliana                                                                                                                                                       | <a href="http://cisbp.ccb.utoronto.ca/bulk.php">http://cisbp.ccb.utoronto.ca/bulk.php</a>                                                                                                                           |
| cisBP_Aegilops_tauschii                                                                                                                                                                                                       | cisBP          | 1177             | 2019-06_v2.00 | Plants                 | cisBP Aegilops_tauschii                                                                                                                                                          | <a href="http://cisbp.ccb.utoronto.ca/bulk.php">http://cisbp.ccb.utoronto.ca/bulk.php</a>                                                                                                                           |
| cisBP_Amborella_trichopoda                                                                                                                                                                                                    | cisBP          | 1291             | 2019-06_v2.00 | Plants                 | cisBP Amborella_trichopoda                                                                                                                                                       | <a href="http://cisbp.ccb.utoronto.ca/bulk.php">http://cisbp.ccb.utoronto.ca/bulk.php</a>                                                                                                                           |
| cisBP_Arabidopsis_lyrata                                                                                                                                                                                                      | cisBP          | 1556             | 2019-06_v2.00 | Plants                 | cisBP Arabidopsis_lyrata                                                                                                                                                         | <a href="http://cisbp.ccb.utoronto.ca/bulk.php">http://cisbp.ccb.utoronto.ca/bulk.php</a>                                                                                                                           |
| cisBP_Brachypodium_distachyon                                                                                                                                                                                                 | cisBP          | 1295             | 2019-06_v2.00 | Plants                 | cisBP Brachypodium_distachyon                                                                                                                                                    | <a href="http://cisbp.ccb.utoronto.ca/bulk.php">http://cisbp.ccb.utoronto.ca/bulk.php</a>                                                                                                                           |
| cisBP_Brassica_napus                                                                                                                                                                                                          | cisBP          | 25               | 2019-06_v2.00 | Plants                 | cisBP Brassica_napus                                                                                                                                                             | <a href="http://cisbp.ccb.utoronto.ca/bulk.php">http://cisbp.ccb.utoronto.ca/bulk.php</a>                                                                                                                           |
| cisBP_Brassica_oleracea                                                                                                                                                                                                       | cisBP          | 1539             | 2019-06_v2.00 | Plants                 | cisBP Brassica_oleracea                                                                                                                                                          | <a href="http://cisbp.ccb.utoronto.ca/bulk.php">http://cisbp.ccb.utoronto.ca/bulk.php</a>                                                                                                                           |
| cisBP_Brassica_rapa                                                                                                                                                                                                           | cisBP          | 1532             | 2019-06_v2.00 | Plants                 | cisBP Brassica_rapa                                                                                                                                                              | <a href="http://cisbp.ccb.utoronto.ca/bulk.php">http://cisbp.ccb.utoronto.ca/bulk.php</a>                                                                                                                           |
| cisBP_Chlamydomonas_reinhardtii                                                                                                                                                                                               | cisBP          | 340              | 2019-06_v2.00 | Plants                 | cisBP Chlamydomonas_reinhardtii                                                                                                                                                  | <a href="http://cisbp.ccb.utoronto.ca/bulk.php">http://cisbp.ccb.utoronto.ca/bulk.php</a>                                                                                                                           |
| cisBP_Cucumis_sativus                                                                                                                                                                                                         | cisBP          | 1398             | 2019-06_v2.00 | Plants                 | cisBP Cucumis_sativus                                                                                                                                                            | <a href="http://cisbp.ccb.utoronto.ca/bulk.php">http://cisbp.ccb.utoronto.ca/bulk.php</a>                                                                                                                           |
| cisBP_Fragaria_vesca                                                                                                                                                                                                          | cisBP          | 1363             | 2019-06_v2.00 | Plants                 | cisBP Fragaria_vesca                                                                                                                                                             | <a href="http://cisbp.ccb.utoronto.ca/bulk.php">http://cisbp.ccb.utoronto.ca/bulk.php</a>                                                                                                                           |
| cisBP_Glycine_max                                                                                                                                                                                                             | cisBP          | 1491             | 2019-06_v2.00 | Plants                 | cisBP Glycine_max                                                                                                                                                                | <a href="http://cisbp.ccb.utoronto.ca/bulk.php">http://cisbp.ccb.utoronto.ca/bulk.php</a>                                                                                                                           |
| cisBP_Gossypium_raimondii                                                                                                                                                                                                     | cisBP          | 1448             | 2019-06_v2.00 | Plants                 | cisBP Gossypium_raimondii                                                                                                                                                        | <a href="http://cisbp.ccb.utoronto.ca/bulk.php">http://cisbp.ccb.utoronto.ca/bulk.php</a>                                                                                                                           |
| cisBP_Helianthus_annuus                                                                                                                                                                                                       | cisBP          | 4                | 2019-06_v2.00 | Plants                 | cisBP Helianthus_annuus                                                                                                                                                          | <a href="http://cisbp.ccb.utoronto.ca/bulk.php">http://cisbp.ccb.utoronto.ca/bulk.php</a>                                                                                                                           |
| cisBP_Hordeum_vulgare                                                                                                                                                                                                         | cisBP          | 1279             | 2019-06_v2.00 | Plants                 | cisBP Hordeum_vulgare                                                                                                                                                            | <a href="http://cisbp.ccb.utoronto.ca/bulk.php">http://cisbp.ccb.utoronto.ca/bulk.php</a>                                                                                                                           |
| cisBP_Leersia_perrieri                                                                                                                                                                                                        | cisBP          | 1300             | 2019-06_v2.00 | Plants                 | cisBP Leersia_perrieri                                                                                                                                                           | <a href="http://cisbp.ccb.utoronto.ca/bulk.php">http://cisbp.ccb.utoronto.ca/bulk.php</a>                                                                                                                           |
| cisBP_Manihot_esculenta                                                                                                                                                                                                       | cisBP          | 1425             | 2019-06_v2.00 | Plants                 | cisBP Manihot_esculenta                                                                                                                                                          | <a href="http://cisbp.ccb.utoronto.ca/bulk.php">http://cisbp.ccb.utoronto.ca/bulk.php</a>                                                                                                                           |
| cisBP_Medicago_truncatula                                                                                                                                                                                                     | cisBP          | 1422             | 2019-06_v2.00 | Plants                 | cisBP Medicago_truncatula                                                                                                                                                        | <a href="http://cisbp.ccb.utoronto.ca/bulk.php">http://cisbp.ccb.utoronto.ca/bulk.php</a>                                                                                                                           |
| cisBP_Musa_acuminata                                                                                                                                                                                                          | cisBP          | 1391             | 2019-06_v2.00 | Plants                 | cisBP Musa_acuminata                                                                                                                                                             | <a href="http://cisbp.ccb.utoronto.ca/bulk.php">http://cisbp.ccb.utoronto.ca/bulk.php</a>                                                                                                                           |
| cisBP_Oryza_barthii                                                                                                                                                                                                           | cisBP          | 1296             | 2019-06_v2.00 | Plants                 | cisBP Oryza_barthii                                                                                                                                                              | <a href="http://cisbp.ccb.utoronto.ca/bulk.php">http://cisbp.ccb.utoronto.ca/bulk.php</a>                                                                                                                           |
| cisBP_Oryza_brachyantha                                                                                                                                                                                                       | cisBP          | 1264             | 2019-06_v2.00 | Plants                 | cisBP Oryza_brachyantha                                                                                                                                                          | <a href="http://cisbp.ccb.utoronto.ca/bulk.php">http://cisbp.ccb.utoronto.ca/bulk.php</a>                                                                                                                           |
| cisBP_Oryza_glaberrima                                                                                                                                                                                                        | cisBP          | 1281             | 2019-06_v2.00 | Plants                 | cisBP Oryza_glaberrima                                                                                                                                                           | <a href="http://cisbp.ccb.utoronto.ca/bulk.php">http://cisbp.ccb.utoronto.ca/bulk.php</a>                                                                                                                           |
| cisBP_Oryza_glumaepatula                                                                                                                                                                                                      | cisBP          | 1311             | 2019-06_v2.00 | Plants                 | cisBP Oryza_glumaepatula                                                                                                                                                         | <a href="http://cisbp.ccb.utoronto.ca/bulk.php">http://cisbp.ccb.utoronto.ca/bulk.php</a>                                                                                                                           |
| cisBP_Oryza_indica                                                                                                                                                                                                            | cisBP          | 1310             | 2019-06_v2.00 | Plants                 | cisBP Oryza_indica                                                                                                                                                               | <a href="http://cisbp.ccb.utoronto.ca/bulk.php">http://cisbp.ccb.utoronto.ca/bulk.php</a>                                                                                                                           |
| cisBP_Oryza_longistaminata                                                                                                                                                                                                    | cisBP          | 1151             | 2019-06_v2.00 | Plants                 | cisBP Oryza_longistaminata                                                                                                                                                       | <a href="http://cisbp.ccb.utoronto.ca/bulk.php">http://cisbp.ccb.utoronto.ca/bulk.php</a>                                                                                                                           |
| cisBP_Oryza_meridionalis                                                                                                                                                                                                      | cisBP          | 1289             | 2019-06_v2.00 | Plants                 | cisBP Oryza_meridionalis                                                                                                                                                         | <a href="http://cisbp.ccb.utoronto.ca/bulk.php">http://cisbp.ccb.utoronto.ca/bulk.php</a>                                                                                                                           |
| cisBP_Oryza_nivara                                                                                                                                                                                                            | cisBP          | 1297             | 2019-06_v2.00 | Plants                 | cisBP Oryza_nivara                                                                                                                                                               | <a href="http://cisbp.ccb.utoronto.ca/bulk.php">http://cisbp.ccb.utoronto.ca/bulk.php</a>                                                                                                                           |
| cisBP_Oryza_punctata                                                                                                                                                                                                          | cisBP          | 1341             | 2019-06_v2.00 | Plants                 | cisBP Oryza_punctata                                                                                                                                                             | <a href="http://cisbp.ccb.utoronto.ca/bulk.php">http://cisbp.ccb.utoronto.ca/bulk.php</a>                                                                                                                           |
| cisBP_Oryza_rufipogon                                                                                                                                                                                                         | cisBP          | 1302             | 2019-06_v2.00 | Plants                 | cisBP Oryza_rufipogon                                                                                                                                                            | <a href="http://cisbp.ccb.utoronto.ca/bulk.php">http://cisbp.ccb.utoronto.ca/bulk.php</a>                                                                                                                           |
| cisBP_Oryza_sativa                                                                                                                                                                                                            | cisBP          | 1321             | 2019-06_v2.00 | Plants                 | cisBP Oryza_sativa                                                                                                                                                               | <a href="http://cisbp.ccb.utoronto.ca/bulk.php">http://cisbp.ccb.utoronto.ca/bulk.php</a>                                                                                                                           |
| cisBP_Ostreococcus_lucimarinus                                                                                                                                                                                                | cisBP          | 418              | 2019-06_v2.00 | Plants                 | cisBP Ostreococcus_lucimarinus                                                                                                                                                   | <a href="http://cisbp.ccb.utoronto.ca/bulk.php">http://cisbp.ccb.utoronto.ca/bulk.php</a>                                                                                                                           |
| cisBP_Phaseolus_vulgaris                                                                                                                                                                                                      | cisBP          | 12               | 2019-06_v2.00 | Plants                 | cisBP Phaseolus_vulgaris                                                                                                                                                         | <a href="http://cisbp.ccb.utoronto.ca/bulk.php">http://cisbp.ccb.utoronto.ca/bulk.php</a>                                                                                                                           |

| <b>Supplementary Table 1 : List of the 187 motif collections integrated in RSAT. This table lists the collection names, date of integration or version, a brief description, and the URL indicating the origin of each database.</b> |               |                  |               |             |                                                                                                                                                                                                                                   |                                                                                                                                                                                                                                 |
|--------------------------------------------------------------------------------------------------------------------------------------------------------------------------------------------------------------------------------------|---------------|------------------|---------------|-------------|-----------------------------------------------------------------------------------------------------------------------------------------------------------------------------------------------------------------------------------|---------------------------------------------------------------------------------------------------------------------------------------------------------------------------------------------------------------------------------|
| Collection name                                                                                                                                                                                                                      | Database name | Number of motifs | Version       | Category    | Brief description                                                                                                                                                                                                                 | URL of origin of the data                                                                                                                                                                                                       |
| cisBP_Physcomitrella_patens                                                                                                                                                                                                          | cisBP         | 1033             | 2019-06_v2.00 | Plants      | cisBP Physcomitrella_patens                                                                                                                                                                                                       | <a href="http://cisbp.ccbcr.utoronto.ca/bulk.php">http://cisbp.ccbcr.utoronto.ca/bulk.php</a>                                                                                                                                   |
| cisBP_Populus_trichocarpa                                                                                                                                                                                                            | cisBP         | 1428             | 2019-06_v2.00 | Plants      | cisBP Populus_trichocarpa                                                                                                                                                                                                         | <a href="http://cisbp.ccbcr.utoronto.ca/bulk.php">http://cisbp.ccbcr.utoronto.ca/bulk.php</a>                                                                                                                                   |
| cisBP_Prunus_mume                                                                                                                                                                                                                    | cisBP         | 1386             | 2019-06_v2.00 | Plants      | cisBP Prunus_mume                                                                                                                                                                                                                 | <a href="http://cisbp.ccbcr.utoronto.ca/bulk.php">http://cisbp.ccbcr.utoronto.ca/bulk.php</a>                                                                                                                                   |
| cisBP_Prunus_persica                                                                                                                                                                                                                 | cisBP         | 1406             | 2019-06_v2.00 | Plants      | cisBP Prunus_persica                                                                                                                                                                                                              | <a href="http://cisbp.ccbcr.utoronto.ca/bulk.php">http://cisbp.ccbcr.utoronto.ca/bulk.php</a>                                                                                                                                   |
| cisBP_Selaginella_moellendorffii                                                                                                                                                                                                     | cisBP         | 1077             | 2019-06_v2.00 | Plants      | cisBP Selaginella_moellendorffii                                                                                                                                                                                                  | <a href="http://cisbp.ccbcr.utoronto.ca/bulk.php">http://cisbp.ccbcr.utoronto.ca/bulk.php</a>                                                                                                                                   |
| cisBP_Setaria_italica                                                                                                                                                                                                                | cisBP         | 1305             | 2019-06_v2.00 | Plants      | cisBP Setaria_italica                                                                                                                                                                                                             | <a href="http://cisbp.ccbcr.utoronto.ca/bulk.php">http://cisbp.ccbcr.utoronto.ca/bulk.php</a>                                                                                                                                   |
| cisBP_Solanum_lycopersicum                                                                                                                                                                                                           | cisBP         | 1399             | 2019-06_v2.00 | Plants      | cisBP Solanum_lycopersicum                                                                                                                                                                                                        | <a href="http://cisbp.ccbcr.utoronto.ca/bulk.php">http://cisbp.ccbcr.utoronto.ca/bulk.php</a>                                                                                                                                   |
| cisBP_Solanum_tuberosum                                                                                                                                                                                                              | cisBP         | 1361             | 2019-06_v2.00 | Plants      | cisBP Solanum_tuberosum                                                                                                                                                                                                           | <a href="http://cisbp.ccbcr.utoronto.ca/bulk.php">http://cisbp.ccbcr.utoronto.ca/bulk.php</a>                                                                                                                                   |
| cisBP_Sorghum_bicolor                                                                                                                                                                                                                | cisBP         | 1306             | 2019-06_v2.00 | Plants      | cisBP Sorghum_bicolor                                                                                                                                                                                                             | <a href="http://cisbp.ccbcr.utoronto.ca/bulk.php">http://cisbp.ccbcr.utoronto.ca/bulk.php</a>                                                                                                                                   |
| cisBP_Triticum_aestivum                                                                                                                                                                                                              | cisBP         | 1293             | 2019-06_v2.00 | Plants      | cisBP Triticum_aestivum                                                                                                                                                                                                           | <a href="http://cisbp.ccbcr.utoronto.ca/bulk.php">http://cisbp.ccbcr.utoronto.ca/bulk.php</a>                                                                                                                                   |
| cisBP_Triticum_urartu                                                                                                                                                                                                                | cisBP         | 1124             | 2019-06_v2.00 | Plants      | cisBP Triticum_urartu                                                                                                                                                                                                             | <a href="http://cisbp.ccbcr.utoronto.ca/bulk.php">http://cisbp.ccbcr.utoronto.ca/bulk.php</a>                                                                                                                                   |
| cisBP_Vitis_vinifera                                                                                                                                                                                                                 | cisBP         | 1418             | 2019-06_v2.00 | Plants      | cisBP Vitis_vinifera                                                                                                                                                                                                              | <a href="http://cisbp.ccbcr.utoronto.ca/bulk.php">http://cisbp.ccbcr.utoronto.ca/bulk.php</a>                                                                                                                                   |
| cisBP_Zea_mays                                                                                                                                                                                                                       | cisBP         | 1334             | 2019-06_v2.00 | Plants      | cisBP Zea_mays                                                                                                                                                                                                                    | <a href="http://cisbp.ccbcr.utoronto.ca/bulk.php">http://cisbp.ccbcr.utoronto.ca/bulk.php</a>                                                                                                                                   |
| DBTBS                                                                                                                                                                                                                                | DBTBS         | 88               | 2015-11       | Prokaryotes | Curated Bacillus subtilis motifs obtained by compiling individual experimentally-derived cis-regulatory elements                                                                                                                  | <a href="http://dbtbs.hgc.jp/">http://dbtbs.hgc.jp/</a>                                                                                                                                                                         |
| regulonDB                                                                                                                                                                                                                            | regulonDB     | 92               | 2015_08       | Prokaryotes | Motifs inferred from the curated compilation of binding sites (Escherichia coli K-12 )                                                                                                                                            | <a href="http://regulondb.ccg.unam.mx/">http://regulondb.ccg.unam.mx/</a>                                                                                                                                                       |
| ATTRACT                                                                                                                                                                                                                              | ATTRACT       | 1322             | 2017          | RNA binding | Motifs compiled from hand-curated experimentally validated data from CISBP-RNA, SpliceAid-F, RBPDB, ASD databases, and predicted from Protein-RNA complexes present in Protein Data Bank database through computational analyses. | <a href="https://attract.cnic.es/download">https://attract.cnic.es/download</a>                                                                                                                                                 |
| RBPDB                                                                                                                                                                                                                                | RBPDB         | 71               | 2017          | RNA binding | Collection of experimental observations of RNA-binding sites, both in vitro and in vivo, manually curated from primary literature                                                                                                 | <a href="http://rbpdb.ccbcr.utoronto.ca/downloads/PFMDir.zip">http://rbpdb.ccbcr.utoronto.ca/downloads/PFMDir.zip</a>                                                                                                           |
| CISBP-RNA                                                                                                                                                                                                                            | cisBP         | 11897            | 2017          | RNA binding | Catalog of Inferred Sequence Binding Proteins of RNA (CISBP-RNA) is a library of RNA binding protein (RBP) motifs and specificities.                                                                                              | <a href="http://cisbp-ma.ccbcr.utoronto.ca/">http://cisbp-ma.ccbcr.utoronto.ca/</a>                                                                                                                                             |
| ENCODE                                                                                                                                                                                                                               | ENCODE        | 2065             | 2018-03       | Vertebrates | Motif analysis for 427 human ENCODE ChIP-seq data                                                                                                                                                                                 | <a href="https://www.ncbi.nlm.nih.gov/pubmed/24335146">https://www.ncbi.nlm.nih.gov/pubmed/24335146</a>                                                                                                                         |
| epigram                                                                                                                                                                                                                              | epigram       | 589              | 2016-06       | Vertebrates | cis elements represent interactions with the site-specific DNA-binding factors that establish and maintain epigenomic modifications.                                                                                              | <a href="http://wanglab.ucsd.edu/star/epigram/">http://wanglab.ucsd.edu/star/epigram/</a>                                                                                                                                       |
| Hocomoco_human                                                                                                                                                                                                                       | Hocomoco      | 771              | 2017-10       | Vertebrates | Motifs discovered with the program ChIPMunk on ChIP-seq datasets                                                                                                                                                                  | <a href="http://hocomoco11.autosome.ru/">http://hocomoco11.autosome.ru/</a>                                                                                                                                                     |
| Hocomoco_mouse                                                                                                                                                                                                                       | Hocomoco      | 531              | 2017-10       | Vertebrates | Motifs discovered with the program ChIPMunk on ChIP-seq datasets                                                                                                                                                                  | <a href="http://hocomoco11.autosome.ru/">http://hocomoco11.autosome.ru/</a>                                                                                                                                                     |
| Homer                                                                                                                                                                                                                                | Homer         | 332              | 2016-07       | Vertebrates | Homer (Human TF motifs)                                                                                                                                                                                                           | <a href="http://homer.saik.edu/homer/motif/motifDatabase.html">http://homer.saik.edu/homer/motif/motifDatabase.html</a>                                                                                                         |
| hPDI                                                                                                                                                                                                                                 | hPDI          | 437              | 2016-06       | Vertebrates | hPDI (Human TFs identified by protein microarray assays)                                                                                                                                                                          | <a href="http://bioinfo.wilmer.jhu.edu/PDI/">http://bioinfo.wilmer.jhu.edu/PDI/</a>                                                                                                                                             |
| HT_Methyl_Selex                                                                                                                                                                                                                      | HT_Selex      | 923              | 2018-03       | Vertebrates | Binding specificities of full-length transcription factors and extended DNA binding domains to unmethylated and CpG-methylated DNA by using methylation-sensitive SELEX                                                           | <a href="http://science.sciencemag.org/content/356/6337/eaaj2239.long">http://science.sciencemag.org/content/356/6337/eaaj2239.long</a>                                                                                         |
| HT_Selex                                                                                                                                                                                                                             | HT_Selex      | 864              | 2018-03       | Vertebrates | Binding specificities of full-length transcription factors and extended DNA binding domains to unmethylated and CpG-methylated DNA by using methylation-sensitive SELEX                                                           | <a href="http://science.sciencemag.org/content/356/6337/eaaj2239.long">http://science.sciencemag.org/content/356/6337/eaaj2239.long</a>                                                                                         |
| Jolma_2013                                                                                                                                                                                                                           | Jolma         | 818              | 2015-11       | Vertebrates | Sequence-specific binding of human TFs using high-throughput SELEX and ChIP sequencing                                                                                                                                            | <a href="http://www.cell.com/abstract/S0092-8674%2812%2901496-1">http://www.cell.com/abstract/S0092-8674%2812%2901496-1</a>                                                                                                     |
| Human TFs dimers                                                                                                                                                                                                                     | Jolma         | 664              | 2016-05       | Vertebrates | Human TF dimers (Human TFs dimers) Cooperative binding of multiple TFs: CAP-SELEX analysis of 9,400 TF-DNA interactions                                                                                                           | <a href="http://www.nature.com/nature/journal/v527/n7578/full/nature15518.html">http://www.nature.com/nature/journal/v527/n7578/full/nature15518.html</a>                                                                       |
| NCAP-SELEX                                                                                                                                                                                                                           | CAP-SELEX     | 195              | 2018-09       | Vertebrates | NCAP-SELEX (HUMAN TFs)                                                                                                                                                                                                            | <a href="https://doi.org/10.1038/s41586-018-0549-5">https://doi.org/10.1038/s41586-018-0549-5</a>                                                                                                                               |
| CAP-SELEX                                                                                                                                                                                                                            | CAP-SELEX     | 186              | 2018-09       | Vertebrates | CAP-SELEX (HUMAN TFs)                                                                                                                                                                                                             | <a href="https://doi.org/10.1038/s41586-018-0549-5">https://doi.org/10.1038/s41586-018-0549-5</a>                                                                                                                               |
| ZF_CHIP-exo                                                                                                                                                                                                                          | ZF_CHIP-exo   | 126              | 2020-07       | Vertebrates | ZF_CHIP-exo (C2H2 zinc fingers)                                                                                                                                                                                                   | <a href="https://www.biorxiv.org/content/10.1101/630756v4">https://www.biorxiv.org/content/10.1101/630756v4</a>                                                                                                                 |
| ZF_CHIP-seq                                                                                                                                                                                                                          | ZF_CHIP-seq   | 109              | 2020-07       | Vertebrates | ZF_CHIP-seq (C2H2 zinc fingers)                                                                                                                                                                                                   | <a href="https://www.biorxiv.org/content/10.1101/630756v4">https://www.biorxiv.org/content/10.1101/630756v4</a>                                                                                                                 |
| MethMotif                                                                                                                                                                                                                            | MethMotif     | 519              | 2018-11       | Vertebrates | Methylated motifs discovered in 11 cell-types (Human TFs)                                                                                                                                                                         | <a href="https://academic.oup.com/nar/advance-article/doi/10.1093/nar/gky1005/5150233">https://academic.oup.com/nar/advance-article/doi/10.1093/nar/gky1005/5150233</a>                                                         |
| cisBP_human                                                                                                                                                                                                                          | cisBP         | 1832             | 2014-10_v0.9  | Vertebrates | CisBP collects data from >25 sources, including other database such as Transfac, JASPAR, HOCOMOCCO, FactorBook, UniProbe, Fly Factor Survey, and dozens of additional publications.                                               | <a href="http://cisbp.ccbcr.utoronto.ca/">http://cisbp.ccbcr.utoronto.ca/</a>                                                                                                                                                   |
| cisBP_mouse                                                                                                                                                                                                                          | cisBP         | 1715             | 2014-10_v0.9  | Vertebrates | CisBP collects data from >25 sources, including other database such as Transfac, JASPAR, HOCOMOCCO, FactorBook, UniProbe, Fly Factor Survey, and dozens of additional publications.                                               | <a href="http://cisbp.ccbcr.utoronto.ca/">http://cisbp.ccbcr.utoronto.ca/</a>                                                                                                                                                   |
| jaspar_core_nonredundant_vertrebrates                                                                                                                                                                                                | Jaspar        | 746              | 2020          | Vertebrates | JASPAR core nonredundant vertebrates                                                                                                                                                                                              | <a href="http://jaspar2020.genereg.net/download/CORE/JASPAR2020_CORE_vertrebrates_non-redundant_pfms_transfac.txt">http://jaspar2020.genereg.net/download/CORE/JASPAR2020_CORE_vertrebrates_non-redundant_pfms_transfac.txt</a> |
| jaspar_core_redundant_vertrebrates                                                                                                                                                                                                   | Jaspar        | 1011             | 2020          | Vertebrates | JASPAR core redundant vertebrates                                                                                                                                                                                                 | <a href="http://jaspar2020.genereg.net/download/CORE/JASPAR2020_CORE_vertrebrates_redundant_pfms_transfac.txt">http://jaspar2020.genereg.net/download/CORE/JASPAR2020_CORE_vertrebrates_redundant_pfms_transfac.txt</a>         |
| jaspar_core_+_unvalidated_vertrebrates                                                                                                                                                                                               | Jaspar        | 1167             | 2022          | Vertebrates | JASPAR core + unvalidated vertebrates                                                                                                                                                                                             | <a href="https://jaspar2022.genereg.net/downloads/">https://jaspar2022.genereg.net/downloads/</a>                                                                                                                               |
| RSAT_nonredundant_vertrebrates                                                                                                                                                                                                       | RSAT          | 2233             | 2017          | Vertebrates | RSAT non-redundant vertebrates                                                                                                                                                                                                    | <a href="http://pedagogix-tagc.univ-mrs.fr/rsat/data/published_data/Castro_2016_matrix-clustering/">http://pedagogix-tagc.univ-mrs.fr/rsat/data/published_data/Castro_2016_matrix-clustering/</a>                               |
| cisBP_Ailuropoda_melanoleuca                                                                                                                                                                                                         | cisBP         | 5863             | 2019-06_v2.00 | Vertebrates | cisBP Ailuropoda_melanoleuca                                                                                                                                                                                                      | <a href="http://cisbp.ccbcr.utoronto.ca/bulk.php">http://cisbp.ccbcr.utoronto.ca/bulk.php</a>                                                                                                                                   |

| <b>Supplementary Table 1 : List of the 187 motif collections integrated in RSAT. This table lists the collection names, date of integration or version, a brief description, and the URL indicating the origin of each database.</b> |                      |                         |                |                 |                                                                 |                                                                                                               |
|--------------------------------------------------------------------------------------------------------------------------------------------------------------------------------------------------------------------------------------|----------------------|-------------------------|----------------|-----------------|-----------------------------------------------------------------|---------------------------------------------------------------------------------------------------------------|
| <b>Collection name</b>                                                                                                                                                                                                               | <b>Database name</b> | <b>Number of motifs</b> | <b>Version</b> | <b>Category</b> | <b>Brief description</b>                                        | <b>URL of origin of the data</b>                                                                              |
| cisBP_Anas_platyrhynchos                                                                                                                                                                                                             | cisBP                | 5038                    | 2019-06_v2.00  | Vertebrates     | cisBP Anas_platyrhynchos                                        | <a href="http://cisbp.ccb.utoronto.ca/bulk.php">http://cisbp.ccb.utoronto.ca/bulk.php</a>                     |
| cisBP_Astyanax_mexicanus                                                                                                                                                                                                             | cisBP                | 5191                    | 2019-06_v2.00  | Vertebrates     | cisBP Astyanax_mexicanus                                        | <a href="http://cisbp.ccb.utoronto.ca/bulk.php">http://cisbp.ccb.utoronto.ca/bulk.php</a>                     |
| cisBP_Bos_taurus                                                                                                                                                                                                                     | cisBP                | 5895                    | 2019-06_v2.00  | Vertebrates     | cisBP Bos_taurus                                                | <a href="http://cisbp.ccb.utoronto.ca/bulk.php">http://cisbp.ccb.utoronto.ca/bulk.php</a>                     |
| cisBP_Callithrix_jacchus                                                                                                                                                                                                             | cisBP                | 6089                    | 2019-06_v2.00  | Vertebrates     | cisBP Callithrix_jacchus                                        | <a href="http://cisbp.ccb.utoronto.ca/bulk.php">http://cisbp.ccb.utoronto.ca/bulk.php</a>                     |
| cisBP_Cavia_porcellus                                                                                                                                                                                                                | cisBP                | 5683                    | 2019-06_v2.00  | Vertebrates     | cisBP Cavia_porcellus                                           | <a href="http://cisbp.ccb.utoronto.ca/bulk.php">http://cisbp.ccb.utoronto.ca/bulk.php</a>                     |
| cisBP_Chlorocebus_sabaeus                                                                                                                                                                                                            | cisBP                | 6176                    | 2019-06_v2.00  | Vertebrates     | cisBP Chlorocebus_sabaeus                                       | <a href="http://cisbp.ccb.utoronto.ca/bulk.php">http://cisbp.ccb.utoronto.ca/bulk.php</a>                     |
| cisBP_Choloepus_hoffmanni                                                                                                                                                                                                            | cisBP                | 4069                    | 2019-06_v2.00  | Vertebrates     | cisBP Choloepus_hoffmanni                                       | <a href="http://cisbp.ccb.utoronto.ca/bulk.php">http://cisbp.ccb.utoronto.ca/bulk.php</a>                     |
| cisBP_Danio_erio                                                                                                                                                                                                                     | cisBP                | 5320                    | 2019-06_v2.00  | Vertebrates     | cisBP Danio_erio                                                | <a href="http://cisbp.ccb.utoronto.ca/bulk.php">http://cisbp.ccb.utoronto.ca/bulk.php</a>                     |
| cisBP_Dasyopus_novemcinctus                                                                                                                                                                                                          | cisBP                | 5871                    | 2019-06_v2.00  | Vertebrates     | cisBP Dasyopus_novemcinctus                                     | <a href="http://cisbp.ccb.utoronto.ca/bulk.php">http://cisbp.ccb.utoronto.ca/bulk.php</a>                     |
| cisBP_Dipodomys_ordii                                                                                                                                                                                                                | cisBP                | 4810                    | 2019-06_v2.00  | Vertebrates     | cisBP Dipodomys_ordii                                           | <a href="http://cisbp.ccb.utoronto.ca/bulk.php">http://cisbp.ccb.utoronto.ca/bulk.php</a>                     |
| cisBP_Echinops_telfairi                                                                                                                                                                                                              | cisBP                | 4813                    | 2019-06_v2.00  | Vertebrates     | cisBP Echinops_telfairi                                         | <a href="http://cisbp.ccb.utoronto.ca/bulk.php">http://cisbp.ccb.utoronto.ca/bulk.php</a>                     |
| cisBP_Equus_caballus                                                                                                                                                                                                                 | cisBP                | 5765                    | 2019-06_v2.00  | Vertebrates     | cisBP Equus_caballus                                            | <a href="http://cisbp.ccb.utoronto.ca/bulk.php">http://cisbp.ccb.utoronto.ca/bulk.php</a>                     |
| cisBP_Erinaceus_europaeus                                                                                                                                                                                                            | cisBP                | 4783                    | 2019-06_v2.00  | Vertebrates     | cisBP Erinaceus_europaeus                                       | <a href="http://cisbp.ccb.utoronto.ca/bulk.php">http://cisbp.ccb.utoronto.ca/bulk.php</a>                     |
| cisBP_Gallus_gallus                                                                                                                                                                                                                  | cisBP                | 5272                    | 2019-06_v2.00  | Vertebrates     | cisBP Gallus_gallus                                             | <a href="http://cisbp.ccb.utoronto.ca/bulk.php">http://cisbp.ccb.utoronto.ca/bulk.php</a>                     |
| cisBP_Homo_sapiens                                                                                                                                                                                                                   | cisBP                | 6607                    | 2019-06_v2.00  | Vertebrates     | cisBP Homo_sapiens                                              | <a href="http://cisbp.ccb.utoronto.ca/bulk.php">http://cisbp.ccb.utoronto.ca/bulk.php</a>                     |
| cisBP_Mus_musculus                                                                                                                                                                                                                   | cisBP                | 6014                    | 2019-06_v2.00  | Vertebrates     | cisBP Mus_musculus                                              | <a href="http://cisbp.ccb.utoronto.ca/bulk.php">http://cisbp.ccb.utoronto.ca/bulk.php</a>                     |
| cisBP_Oreochromis_niloticus                                                                                                                                                                                                          | cisBP                | 5296                    | 2019-06_v2.00  | Vertebrates     | cisBP Oreochromis_niloticus                                     | <a href="http://cisbp.ccb.utoronto.ca/bulk.php">http://cisbp.ccb.utoronto.ca/bulk.php</a>                     |
| cisBP_Rattus_norvegicus                                                                                                                                                                                                              | cisBP                | 5946                    | 2019-06_v2.00  | Vertebrates     | cisBP Rattus_norvegicus                                         | <a href="http://cisbp.ccb.utoronto.ca/bulk.php">http://cisbp.ccb.utoronto.ca/bulk.php</a>                     |
| cisBP_Xenopus_tropicalis                                                                                                                                                                                                             | cisBP                | 5393                    | 2019-06_v2.00  | Vertebrates     | cisBP Xenopus_tropicalis                                        | <a href="http://cisbp.ccb.utoronto.ca/bulk.php">http://cisbp.ccb.utoronto.ca/bulk.php</a>                     |
| FactorBook_ChIP-seq                                                                                                                                                                                                                  | FactorBook           | 6921                    | 2022-04        | Vertebrates     | Motifs discovered by MEME-ChIP in ENCODE hIP-seq datasets       | <a href="https://www.factorbook.org/motif/human/download">https://www.factorbook.org/motif/human/download</a> |
| FactorBook_SELEX                                                                                                                                                                                                                     | FactorBook           | 6700                    | 2022-04        | Vertebrates     | Motifs discovered by ZMotif in reads from SELEX-seq experiments | <a href="https://www.factorbook.org/motif/human/download">https://www.factorbook.org/motif/human/download</a> |
